# Supplementary material for: Bcl-2 supports survival and metabolic fitness of quiescent tissue-resident ILC3
Source: PubMed Central journal article supplement (PMC10564625; doi:10.1016/j.mucimm.2023.07.001), 2023-10
Supplement: mmc1.pdf [file mmc1.pdf]

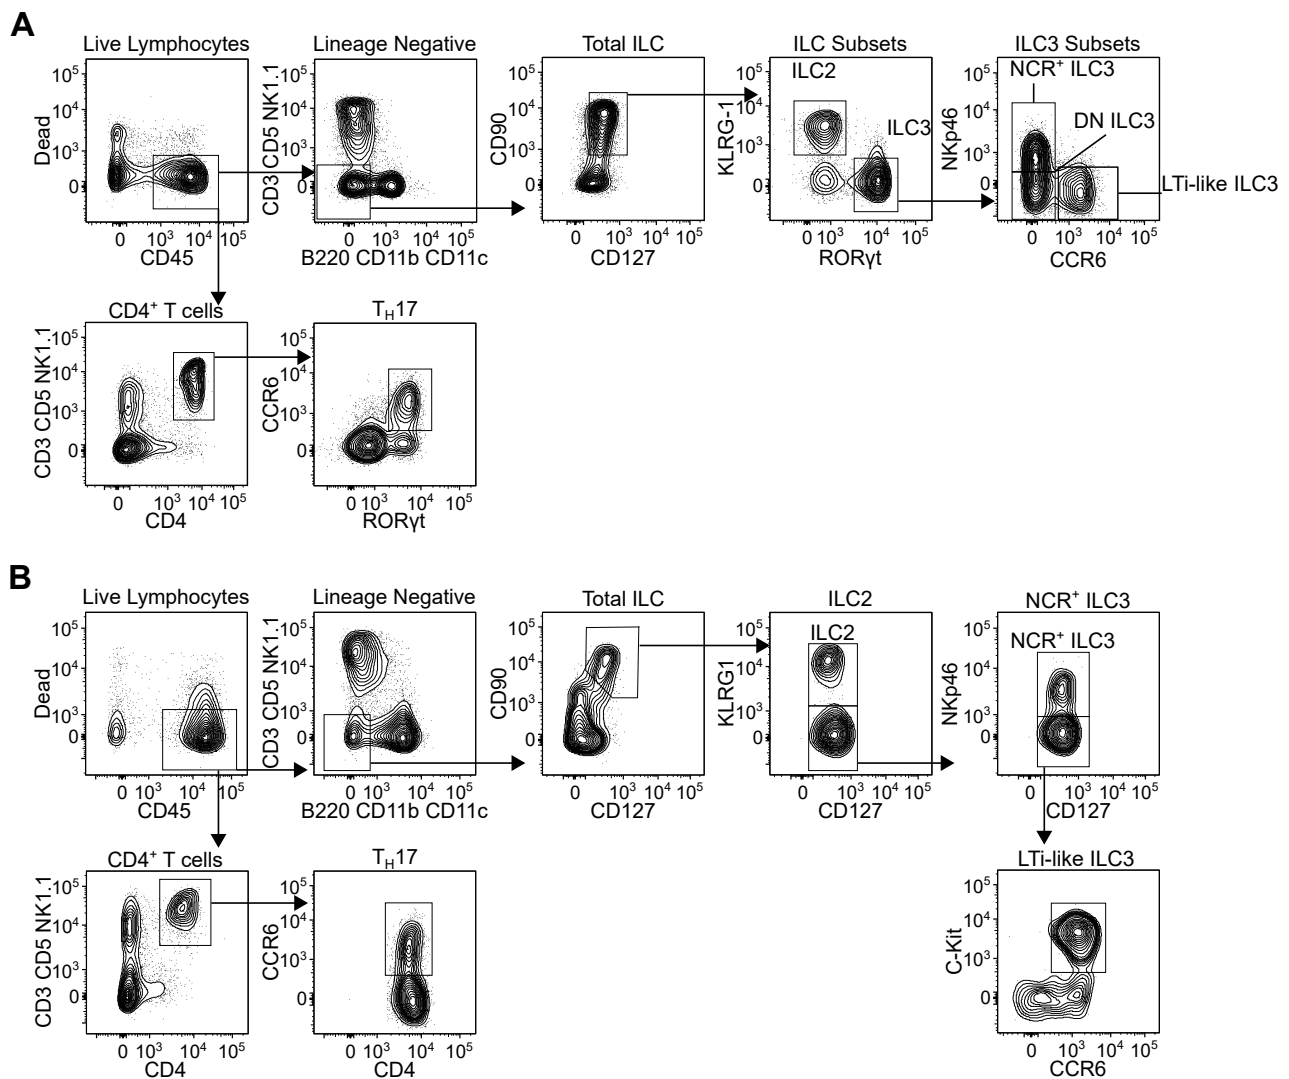

**Figure S1. Representative gating strategies to identify ILC3 subsets and Th17 cells. (A)** Exemplar gating strategy for intracellular staining; total ILC (Live, CD45<sup>+</sup> / Lin<sup>-</sup> / CD90<sup>+</sup>, CD127<sup>+</sup>) and subsequently ILC2 (KLRG1<sup>+</sup>, RORγt<sup>+</sup>), total ILC3 (KLRG1<sup>-</sup>, RORγt<sup>+</sup>) and ILC3 subsets; DN ILC3 (CCR6<sup>-</sup>, NKp46<sup>-</sup>), NCR<sup>+</sup> ILC3 (CCR6<sup>-</sup>, NKp46<sup>+</sup>) and LTI-like ILC3 (CCR6<sup>+</sup>, NKp46<sup>-</sup>). Th17 cells were gated as CD3<sup>+</sup>, CD5<sup>+</sup>, NK1.1<sup>+</sup> / CD4<sup>+</sup> / CCR6<sup>+</sup>, RORγt<sup>+</sup>. **(B)** Live cell gating strategy; total ILC as in panel A, ILC2 (KLRG1<sup>+</sup>), NCR<sup>+</sup> ILC3 (KLRG1<sup>-</sup> / NKp46<sup>+</sup>) and LTI-like ILC3 (KLRG1<sup>-</sup> / NKp46<sup>-</sup> / CCR6<sup>+</sup>, C-Kit<sup>+</sup>). Th17 cells were gated as CD3<sup>+</sup>, CD5<sup>+</sup>, NK1.1<sup>+</sup> / CD4<sup>+</sup> / CCR6<sup>+</sup>.

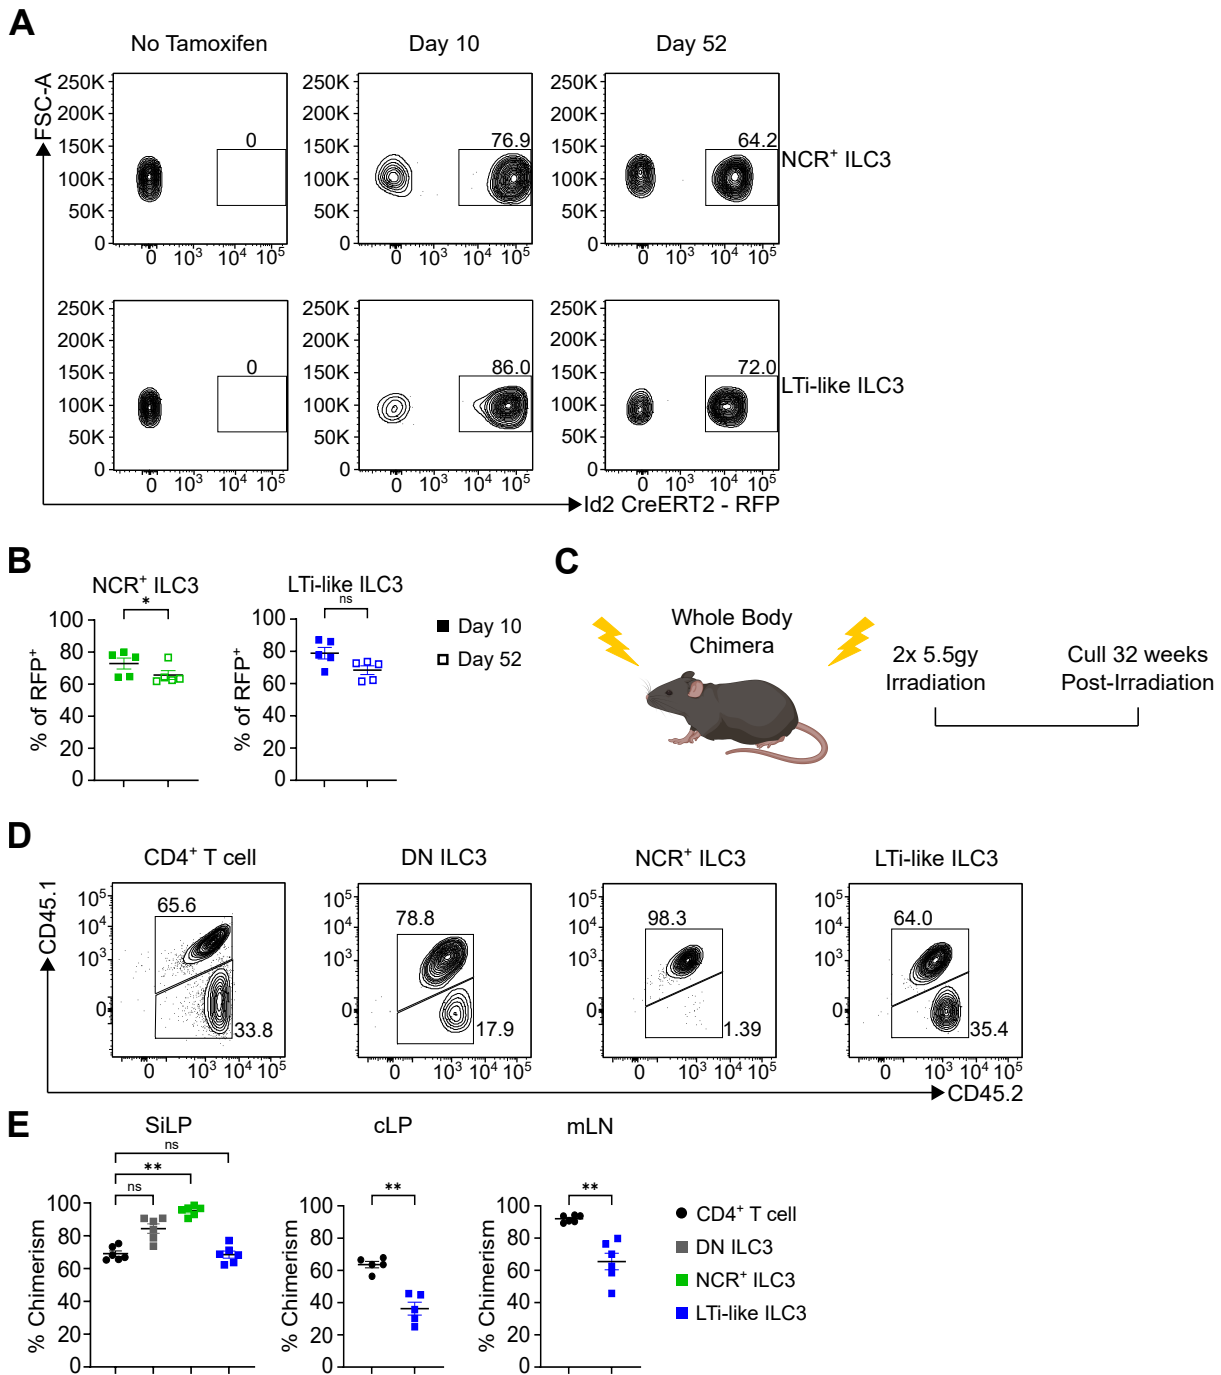

**Figure S2. Intestinal ILC3s are maintained independently of bone marrow replenishment. (A-B)** Frequency of Id2<sup>ERT2Cre-RFP</sup> labelled NCR<sup>+</sup> ILC3s and LTI-like ILC3s in SiLP of no tamoxifen controls, or 10 days or 52 days post-labelling. **(C)** Experimental design for whole body chimeras. Recipient (CD45.2<sup>+</sup>) adult C57BL/6 mice received sub-lethal whole-body irradiation followed by injection of Donor (CD45.1/2<sup>+</sup>) bone marrow. Mice were culled 32 weeks post irradiation. **(D-E)** Frequency of CD45.2<sup>+</sup> CD4<sup>+</sup> T cells, DN ILC3, NCR<sup>+</sup> ILC3s, and LTI-like ILC3s in SiLP (D+E), cLP and mLN (E). Panels A-B gated as in Figure S1B, D-E gated as in Figure S1A. Data shown as mean  $\pm$  SEM and represent two independent experiments (n = 5 – 6). Numbers in flow plot indicate percentage of cells in the respective gate. \*P < 0.05, \*\*P < 0.01, \*\*\*P < 0.001, \*\*\*\*P < 0.0001 using Mann-Whitney test (B+E) or Dunn's multiple comparisons test (E; SiLP).

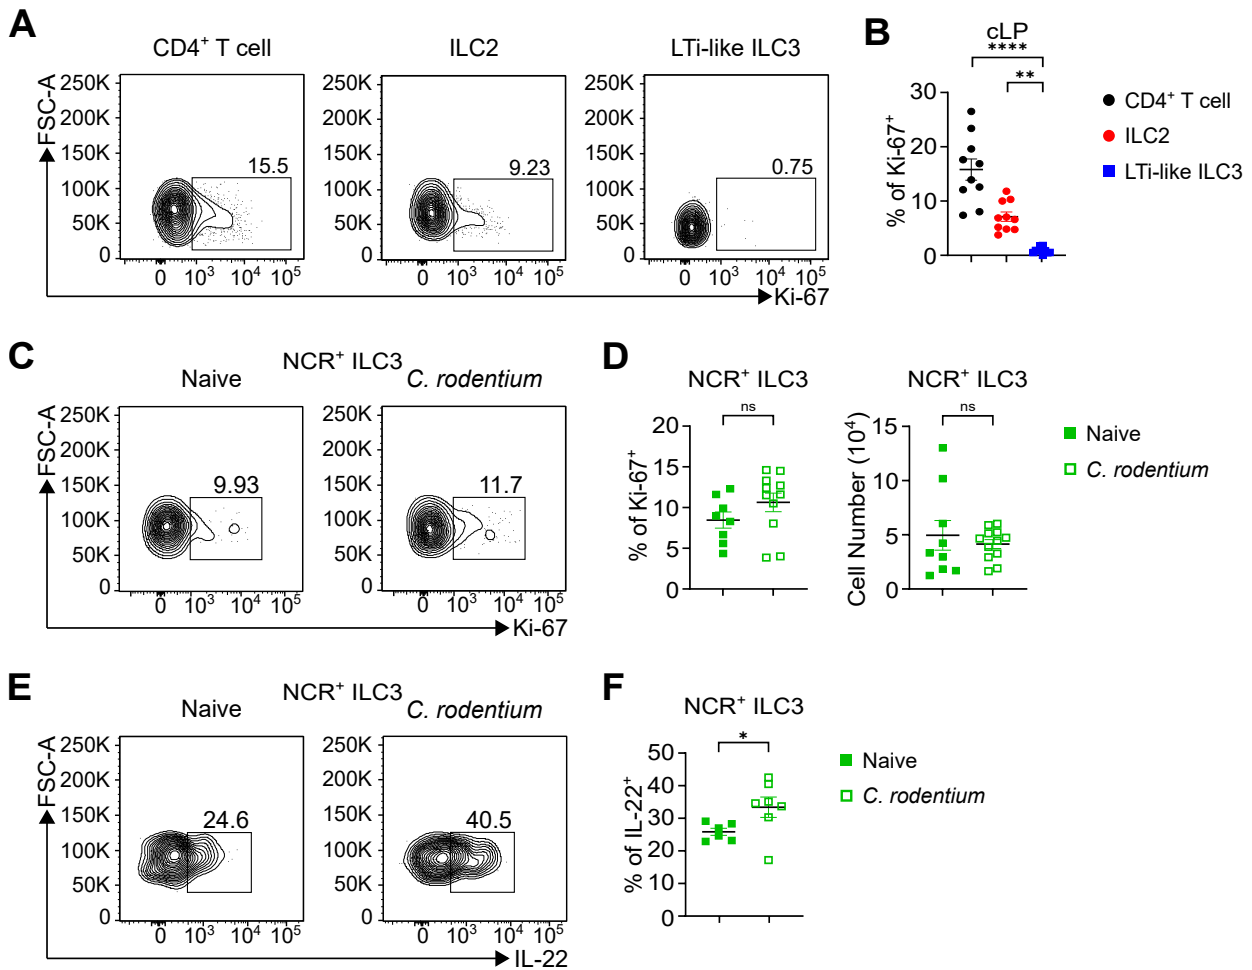

**Figure S3. Proliferative capacity of colonic ILC and T cells at steady state and in response to *C. rodentium*.** (A-B) Frequency of Ki-67 expression in CD4<sup>+</sup> T cell, ILC2 and LTi-like ILC3 in cLP. (C-D) Frequency of Ki-67 expression and cell number of NCR<sup>+</sup> ILC3 in cLP of naïve or *C. rodentium* infected (Day 6) mice. (E-F) Frequency of IL-22 production in NCR<sup>+</sup> ILC3 in cLP of naïve or *C. rodentium* infected (Day 6) mice. CD4<sup>+</sup> T cell, ILC2 and ILC3 subsets gated as in Figure S1A. Data shown as mean +/- SEM (n = 9 – 12) and represent three independent experiments. Numbers in flow plot indicate percentage of cells in the respective gate. \*P < 0.05, \*\*P < 0.01, \*\*\*P < 0.001, \*\*\*\*P < 0.0001 using Holm-Šidák's multiple comparisons test (B), unpaired t-test (D) or Mann-Whitney test (F).

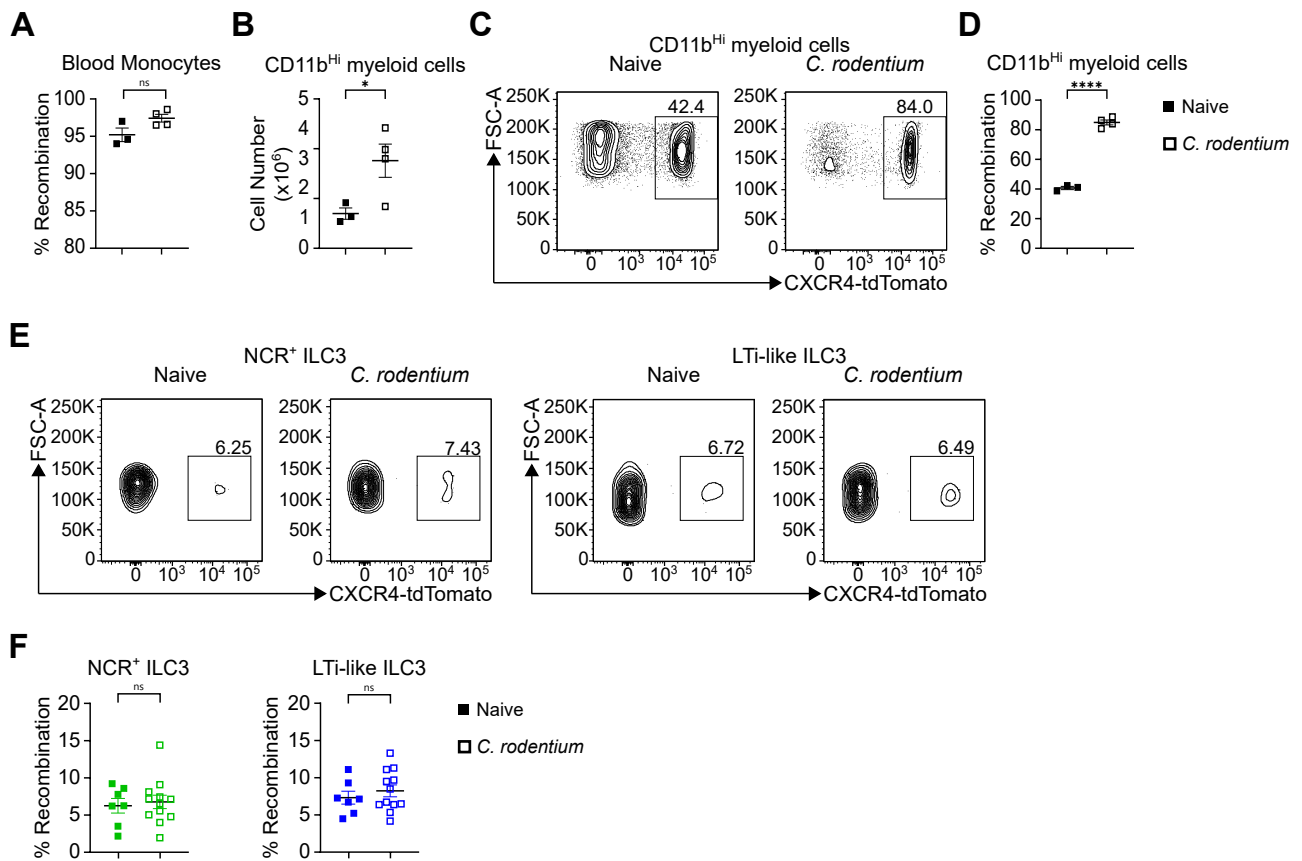

**Figure S4. Bone marrow replenishment of ILC3 is negligible during *C. rodentium* infection.** (A) Frequency of tdTomato<sup>+</sup> blood monocytes (live CD45<sup>+</sup> CD11b<sup>+</sup> Lys6C<sup>Hi</sup>) in naïve and *C. rodentium* infected (Day 14) Cxcr4-CreERT2 tdTomato mice. (B) Number of CD11b<sup>Hi</sup> myeloid cells in colon lamina propria (cLP) of naïve and *C. rodentium* infected (Day 14) mice. (C-D) Frequency of Cxcr4-CreERT2-tdTomato labelled cLP CD11b<sup>Hi</sup> myeloid cells in naïve and *C. rodentium* infected (Day 14) mice. (E-F) Frequency of Cxcr4-CreERT2-tdTomato labelled cLP ILC3 subsets in naïve and *C. rodentium* infected (Day 14) mice. Panels E-F gated as in Figure S1B. Data shown as mean  $\pm$  SEM and represent 2 independent experiments (n = 7 - 12). Numbers in flow plot indicate percentage of cells in the respective gate. \*P < 0.05, \*\*P < 0.01, \*\*\*P < 0.001, \*\*\*\*P < 0.0001 using Unpaired t-test (A, B, F) or Mann Whitney test (D).

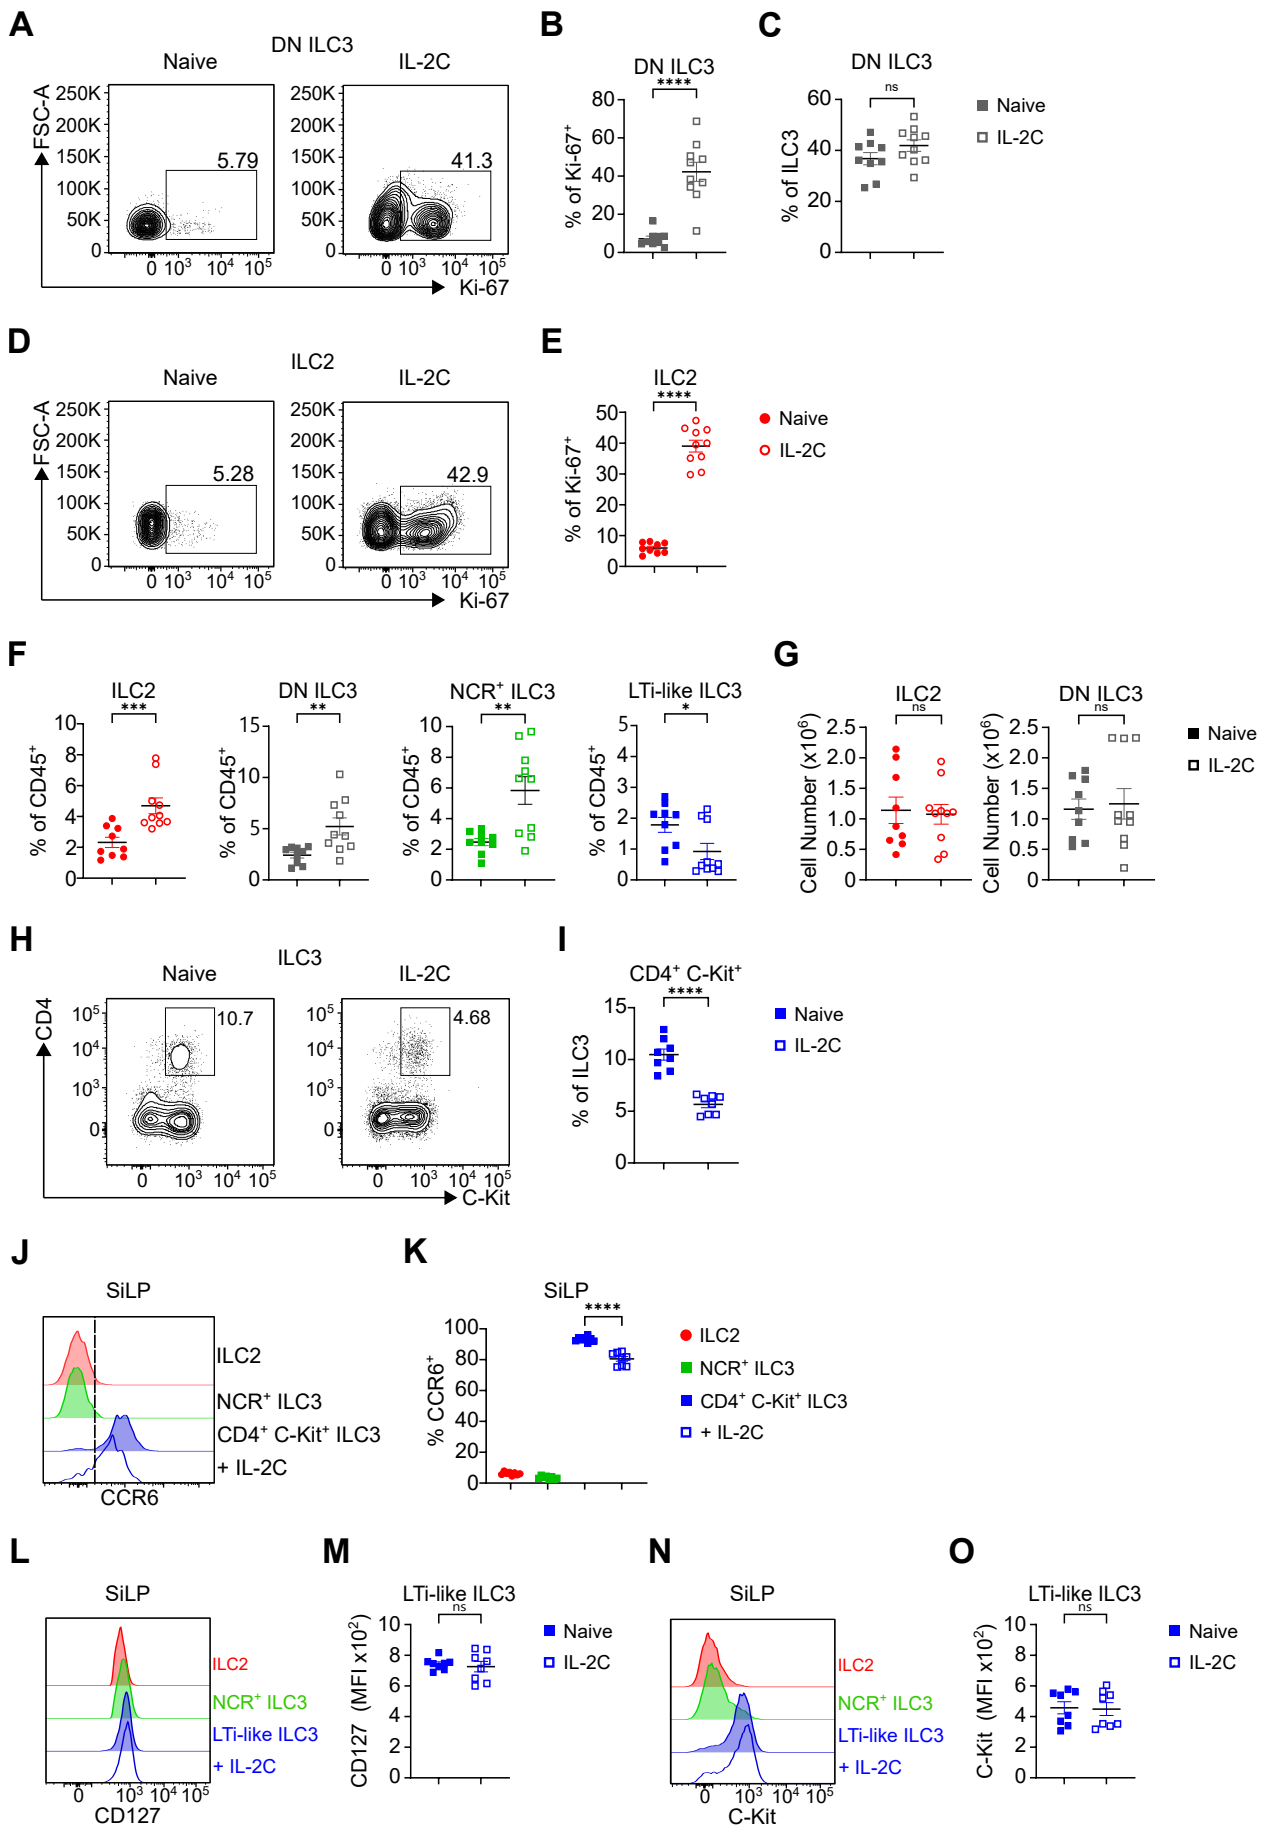

**Figure S5. IL-2C-induces proliferation of ILC but decreases frequency of LTi-like ILC3. (A-B)** Frequency of Ki-67 expression in siLP DN ILC3 in naïve or IL-2C treated mice. **(C)** Frequency of siLP DN ILC3 in naïve or IL-2C treated mice. **(D-E)** Frequency of Ki-67 expression in ILC2 in SiLP in naïve or IL-2C treated mice. **(F-G)** Frequency as a percentage of CD45<sup>+</sup> and cell number of siLP ILC2 and ILC3 subsets in naïve or IL-2C treated mice. ILC2 and ILC3 subsets gated as in Figure S1A. **(H-I)** Representative flow plots and quantification of LTi-like ILC3 percentages in SiLP of IL-2C treated mice using an alternative gating strategy (c-kit<sup>+</sup> CD4<sup>+</sup>), and **(J-K)** expression of CCR6 on LTi-like ILC3 gating as in H-I compared to other ILC subsets. **(L-O)** representative histograms and MFI quantification of CD127 (L-M) and c-kit (N-O) on LTi-like ILC3 compared to other ILC subsets. Data shown as mean +/- SEM and represent three independent experiments (n = 8 – 12). Numbers in flow plot indicate percentage of cells in the respective gate. \*P< 0.05, \*\*P<0.01, \*\*\*P<0.001, \*\*\*\*P<0.0001 using Mann-Whitney test.

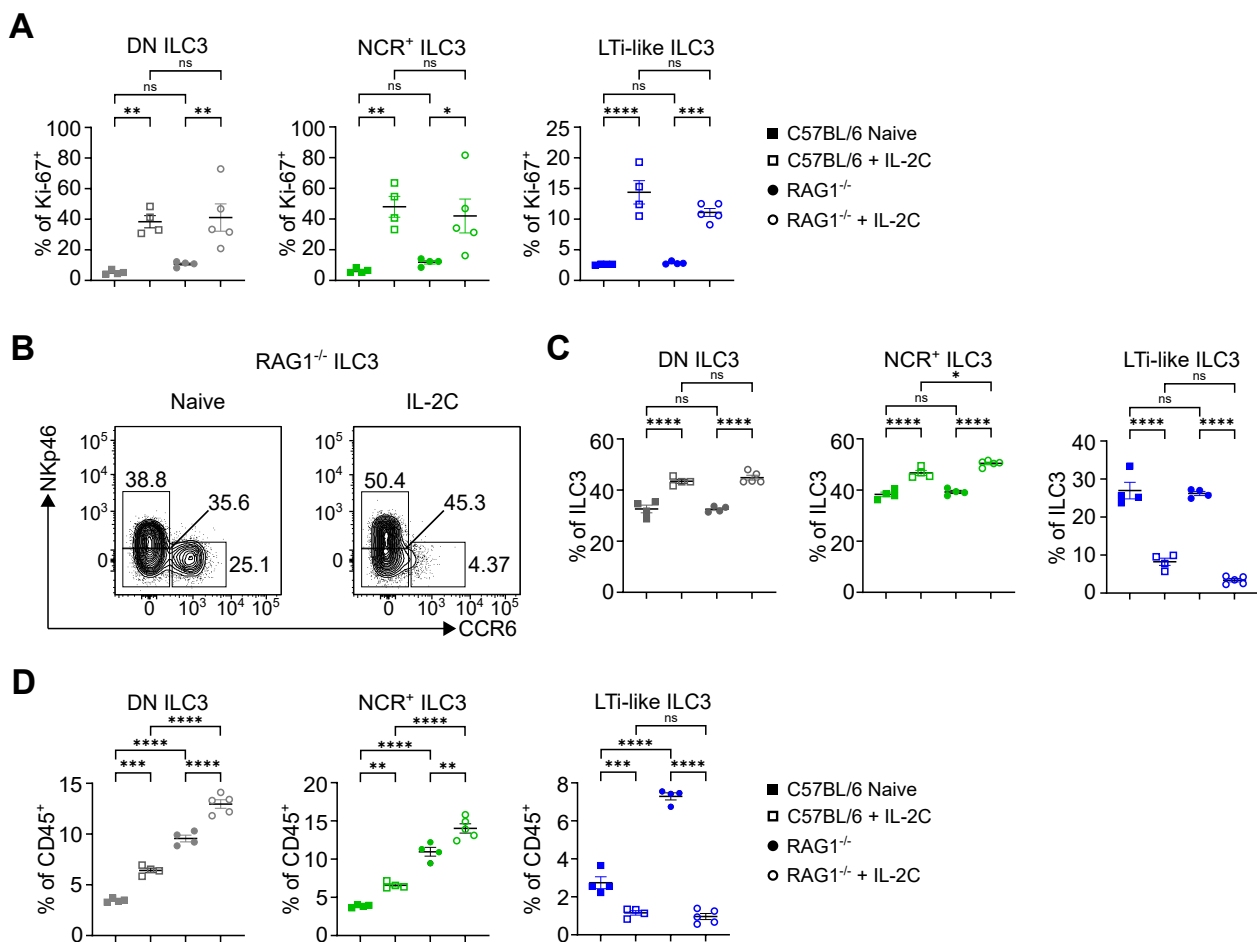

**Figure S6. IL-2C-induced loss of LTI-like ILC3 is independent of adaptive immunity. (A)** Ki-67 expression in siLP ILC3 subsets in naïve or IL-2C treated C57BL/6 or RAG1<sup>-/-</sup> mice. **(B-D)** Frequency of siLP ILC3 subsets in naïve or IL-2C treated C57BL/6 or RAG1<sup>-/-</sup> mice. ILC3 subsets gated as in Figure S1A. Data shown as mean  $\pm$  SEM and represent two independent experiments (n = 7-8). Numbers in flow plot indicate percentage of cells in the respective gate. \*P < 0.05, \*\*P < 0.01, \*\*\*P < 0.001, \*\*\*\*P < 0.0001 using Tukey's multiple comparison test.

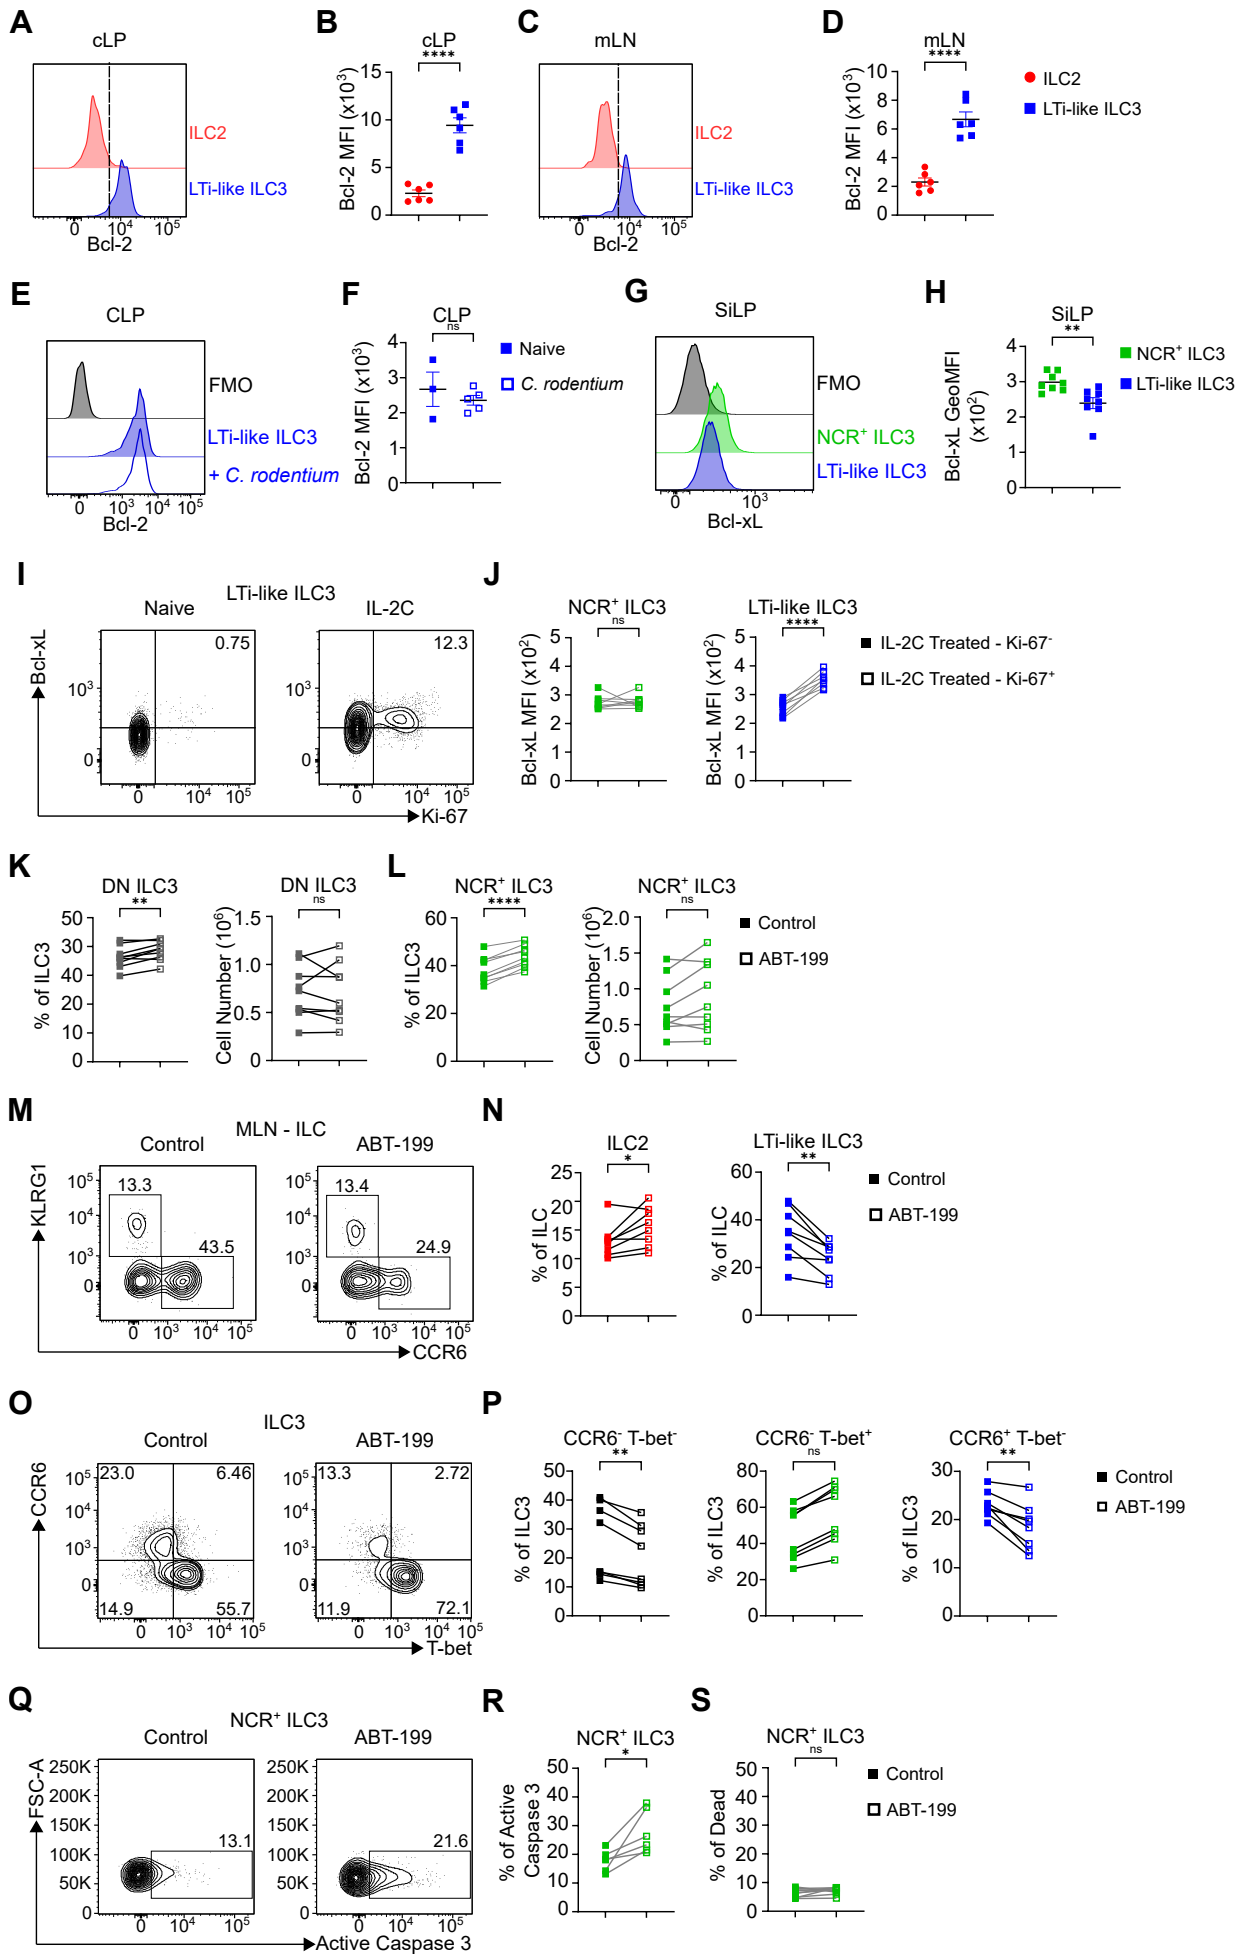



**Figure S7. Bcl-2 inhibition has little effect on NCR<sup>+</sup> ILC3 survival.** (A-D) Bcl-2 expression in ILC2 and LTi-like ILC3 in cLP and mLN of naïve animals, and (E-F) in cLP LT-like ILC3 following *C. rodentium* infection. (G-H) Representative histogram and MFI quantification of Bcl-xL in NCR<sup>+</sup> ILC3 and LTi-like ILC3 from naïve SiLP. (I-J) Bcl-X<sub>L</sub> in Ki-67<sup>-</sup> and Ki-67<sup>+</sup> NCR<sup>+</sup> ILC3 and LTi-like ILC3 in IL-2C treated mice. (K and L) Frequency and cell number of siLP DN ILC3 and NCR<sup>+</sup> ILC3 +/- ABT-199 treatment ex vivo. (M and N) Frequency of mLN ILC2 and LTi-like ILC3 +/- ABT-199 treatment ex vivo. (O-P) Representative histograms of CCR6 versus Tbet expressing ILC3 in SiLP cells +/- ABT-199 treatment ex vivo. (Q-S) Frequency of active caspase 3 expression (Q and R) and live/dead acquisition (S) in NCR<sup>+</sup> ILC3 in SiLP +/- ABT-199 treatment ex vivo. ILC2 and ILC3 subsets in panels A-J gated as in Figure S1A, panels Q-S gated as in Figure S1B. Data shown as mean +/- SEM (B-H) or individual data points (I-S) and represent two (B, F, H, J, R, S) or three independent experiments (D, K, L, N, P) (n = 5 – 9). Numbers in flow plot indicate percentage of cells in the respective gate. Data in panels J, K, L, N, P, R and S represent paired samples from same animals with or without treatment. \*P< 0.05, \*\*P<0.01, \*\*\*P<0.001, \*\*\*\*P<0.0001 using unpaired t-test (B-H) or paired t-test (J-S).

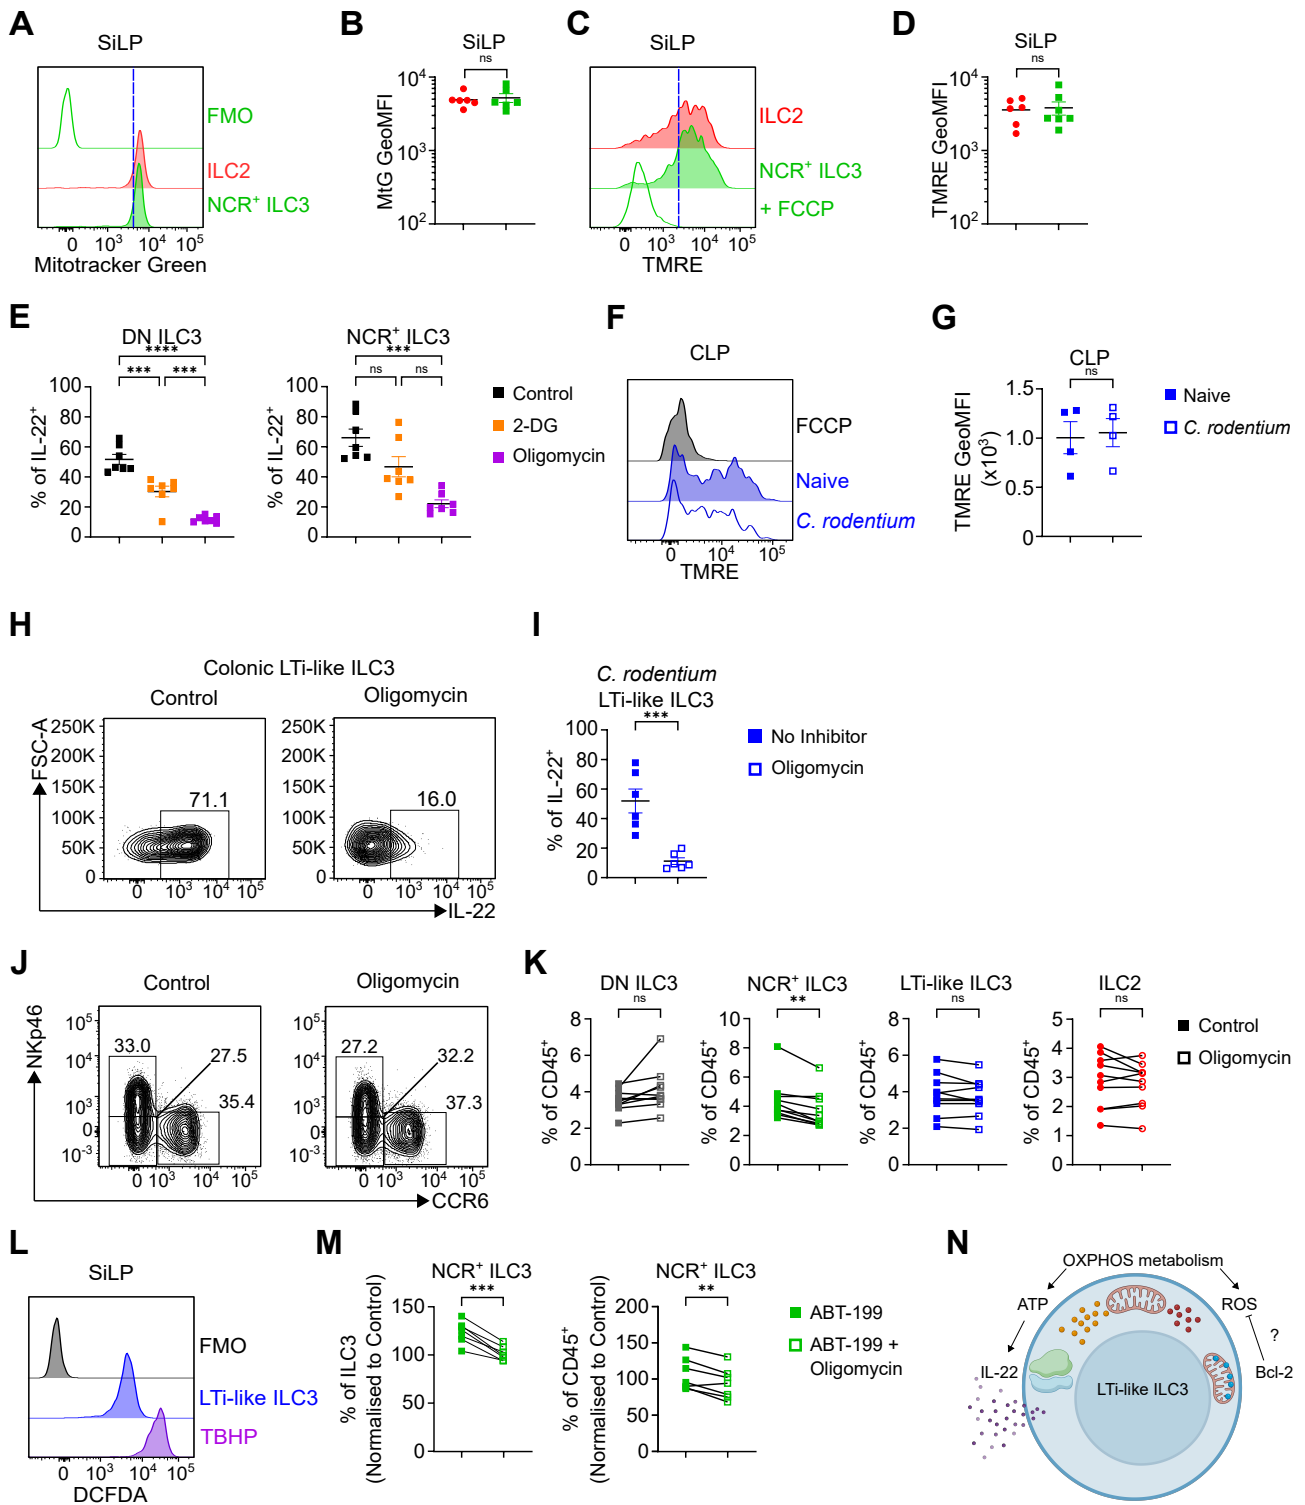

**Figure S8. Intracellular balance between metabolism and stress in ILC3.** (A-B) Representative histogram of mitochondrial mass and MFI in ILC2 and NCR<sup>+</sup> ILC3 in SiLP (Dashed blue line represents LTI-like ILC3 average mitochondrial mass). (C-D) Representative histogram of TMRE staining and MFI quantification in ILC2 and NCR<sup>+</sup> ILC3 in SiLP (Dashed blue line represents LTI-like ILC3 average TMRE intensity). (E) IL-1 $\beta$ /-23 induced IL-22 production +/- 2-DG or Oligomycin treatment *ex vivo* in siLP DN ILC3 and NCR<sup>+</sup> ILC3. (F-G) Representative histogram of TMRE staining and MFI quantification in colonic LTI-like ILC3 from naïve and *C. rodentium* infected mice. (H-I) Representative plots and quantification of the percentage of IL-22<sup>+</sup> colonic LTI-

like ILC3 from *C. rodentium* infected mice with or without treatment with oligomycin. **(J-K)** Representative plots and quantification of the percentage of siLP ILC subsets in naïve cells cultured *ex vivo* with or without oligomycin. **(L)** Representative histogram of cellular ROS (DCFDA) in DCFDA FMO and LTI-like ILC3 +/- tert-Butyl hydroperoxide (TBHP). **(M)** Normalised frequency of NCR<sup>+</sup> ILC3 treated with ABT-199 +/- Oligomycin treatment in SiLP. **(N)** Cartoon detailing the balance of metabolic stress in LTI-like ILC3 to facilitate function and survival. Panels A-D, F-G and L gated as in Figure S1B, panels E, H-K and M as in Figure S1A. Data shown as mean +/- SEM and individual data points and represent two (E, G) or three independent experiments (B, D, I, K, M) (n = 4-9). Data in K and M represent paired samples from same animals with or without treatment. \*P < 0.05, \*\*P < 0.01, \*\*\*P < 0.001, \*\*\*\*P < 0.0001 using unpaired t-test (B, D, G, I), paired t-test (K, M) or Dunn's multiple comparisons test (E).
